# Supplementary material for: Adiponectin is associated with inflammaging and age-related salivary gland lipid accumulation
Source: publisher site journal article supplement (doi:10.18632/aging.204618), 2023-03-27
Supplement: Supplementary file [file aging-v15i6-204618-supplementary-material-SD1.pdf]

## SUPPLEMENTARY FIGURES

| Gene_Symbol  | Gene_ID   | mRNA Accession  | Fold Change Aged/Adult (PG) |
|--------------|-----------|-----------------|-----------------------------|
| IGHM         | 3507      | BC011857        | 6.968879                    |
| LOC101927120 | 101927120 | NR_110136       | 2.908335                    |
| SLC7A5       | 8140      | NM_003486       | 2.841554                    |
| KRTAP5-2     | 440021    | NM_001004325    | 2.203520                    |
| SNORD37      | 26812     | NR_002602       | 2.157255                    |
| KRT6B        | 3854      | NM_005555       | 2.069454                    |
| SERPINA5     | 5104      | NM_000624       | 2.015452                    |
| LOC105375217 | 105375217 | XR_927147       | 1.925442                    |
| MYH1         | 4619      | NM_005963       | 1.910244                    |
| VTRNA1-1     | 56664     | NR_026703       | 1.909657                    |
| GOLGA6L7P    | 728310    | NR_047567       | 1.845630                    |
| LTF          | 4057      | NM_001199149    | 1.815881                    |
| MIR548AN     | 100616144 | NR_039765       | 1.809482                    |
| GH2          | 2689      | NM_002059       | 1.775243                    |
| ZNF708       | 7562      | NM_001297560    | 1.749792                    |
| LOC105375044 | 105375044 | XR_926767       | 1.689906                    |
| CACNA1D      | 776       | NM_000720       | 1.635336                    |
| LCE3E        | 353145    | NM_178435       | 1.627860                    |
| ZMAT3        | 64393     | NM_022470       | 1.597397                    |
| MIR520E      | 574461    | NR_030183       | 1.557508                    |
| MIR891A      | 100126341 | NR_030581       | 1.548770                    |
| LOC100507494 | 100507494 | AK090481        | 1.539391                    |
| SNORD115-45  | 100036566 | NR_003498       | 1.537014                    |
| LRRC3C       | 100505591 | NM_001195545    | 1.526499                    |
| MAPT-IT1     | 100130148 | ENST00000626958 | 1.513355                    |
| LOC105376527 | 105376527 | XR_930988       | 1.506562                    |
| LINC01524    | 101927700 | NR_110038       | -1.501124                   |
| LRP2         | 4036      | NM_004525       | -1.503005                   |
| IQCF2        | 389123    | NM_203424       | -1.508920                   |
| FRMD8P1      | 83957     | NR_033742       | -1.510207                   |
| AVPR2        | 554       | NM_000054       | -1.522772                   |
| LINC01015    | 100507362 | NR_037179       | -1.523004                   |
| STX19        | 415117    | NM_001001850    | -1.535952                   |
| OR4S2        | 219431    | NM_001004059    | -1.546214                   |
| LOC102724104 | 102724104 | XR_937125       | -1.594341                   |
| USP17L22     | 100287513 | NM_001256863    | -1.623754                   |
| MIR4645      | 100616285 | NR_039788       | -1.632908                   |
| MIR4730      | 100616359 | NR_039883       | -1.633304                   |
| NEBL-AS1     | 100128511 | NR_046283       | -1.651908                   |
| LOC105376165 | 105376165 | XR_930152       | -1.658585                   |
| LOC105379082 | 105379082 | XR_948567       | -1.678102                   |
| TCP10L2      | 401285    | XM_011535822    | -1.687725                   |
| MCOLN3       | 55283     | NM_001253693    | -1.710170                   |
| CFTR         | 1080      | NM_000492       | -1.748196                   |
| CCDC122      | 160857    | NM_144974       | -1.756902                   |
| LOC105374086 | 105374086 | XM_011536382    | -1.760010                   |
| TAC1         | 6863      | NM_003182       | -1.878416                   |
| OR4C16       | 219428    | NM_001004701    | -1.911966                   |
| TMEM52B      | 120939    | NM_001079815    | -1.945723                   |
| SERHL        | 94009     | NR_027786       | -2.003061                   |
| PPBP         | 5473      | NM_002704       | -2.012441                   |
| MIR516A1     | 574498    | NR_030220       | -2.021020                   |
| GK           | 2710      | NM_000167       | -2.083833                   |
| LINC01139    | 339535    | NR_015407       | -2.090860                   |
| SCD          | 6319      | NM_005063       | -2.145316                   |
| RNU12        | 267010    | NR_029422       | -2.211497                   |
| CES1P1       | 51716     | ENST00000421606 | -2.259019                   |

**Supplementary Figure 1. List of DEGs between adult and aged parotid glands.** List of differentially expressed genes (DEGs) between adult and aged parotid gland (based on at least a 1.5-fold change and  $p$  value < 0.05).

| Gene_Symbol  | Gene_ID   | mRNA Accession     | Fold Change<br>Aged/Adult (SMG) |
|--------------|-----------|--------------------|---------------------------------|
| C5N3         | 1448      | NM_005212          | 3.877379                        |
| ODAM         | 54959     | NM_017855          | 3.621289                        |
| ZCWPW2       | 152098    | AB087877           | 3.485096                        |
| ADIPOQ       | 9370      | NM_001177800       | 3.281488                        |
| PLIN1        | 5346      | NM_001145311       | 2.753045                        |
| TRDJ4        | 28519     | OTTHUMT00000410933 | 2.563580                        |
| PEG10        | 23089     | NM_001040152       | 2.513301                        |
| DMBT1        | 1755      | NM_004406          | 2.477414                        |
| LCN2         | 3934      | NM_005564          | 2.469396                        |
| RPL23AP7     | 118433    | NR_000029          | 2.445967                        |
| CXCL17       | 284340    | NM_198477          | 2.402523                        |
| MIR378E      | 100616498 | NR_039609          | 2.359912                        |
| H3F3B        | 3021      | NM_005324          | 2.209932                        |
| GLP1R        | 2740      | NM_002062          | 2.207696                        |
| C10orf107    | 219621    | NM_173554          | 2.138469                        |
| MIR4739      | 100616170 | NR_039893          | 2.130492                        |
| NP1P811      | 728888    | XM_011546005       | 2.109301                        |
| LOC644135    | 644135    | XR_943016          | 2.056472                        |
| LRRC32       | 2615      | NM_001128922       | 2.033439                        |
| SLC13A2      | 9058      | NM_001145975       | 2.021024                        |
| LAMA2        | 3908      | NM_000426          | 2.014116                        |
| ITM2A        | 9452      | NM_001171581       | 1.989942                        |
| MMIP7        | 4316      | NM_002423          | 1.968020                        |
| HSPB6        | 126393    | NM_144617          | 1.908638                        |
| HIST2H2BE    | 8349      | NM_003528          | 1.908203                        |
| LOC729162    | 729162    | XR_950549          | 1.884894                        |
| GFR3         | 2676      | NM_001496          | 1.848942                        |
| FAM66A       | 100133172 | NR_026789          | 1.847736                        |
| EBF1         | 1879      | NM_001290360       | 1.788372                        |
| MIR29C       | 407026    | NR_029832          | 1.784049                        |
| MEIS3P1      | 4213      | NR_002211          | 1.783632                        |
| NAGPA-A51    | 100507589 | NR_038913          | 1.783336                        |
| MIR4473      | 100616229 | NR_039684          | 1.771455                        |
| PNRC2        | 55629     | NM_017761          | 1.763217                        |
| TLR7         | 51284     | NM_016562          | 1.746700                        |
| FMOD         | 2331      | NM_002023          | 1.744332                        |
| SPANXN5      | 494197    | NM_001009616       | 1.742244                        |
| GPNMB        | 10457     | NM_001005340       | 1.688689                        |
| NXFS         | 55998     | NM_032946          | 1.679810                        |
| ANPEP        | 290       | NM_001150          | 1.679531                        |
| LOC105376093 | 105376093 | XR_929954          | 1.652129                        |
| IRX6         | 79190     | NM_024335          | 1.649560                        |
| ANKRD10      | 559508    | NR_104586          | 1.646286                        |
| HNRNPC       | 3183      | NM_001077442       | 1.638772                        |
| ZNF284       | 342909    | NM_001037813       | 1.633540                        |
| LOC105373730 | 105373730 | XR_923551          | 1.622980                        |
| MIR4494      | 100616478 | NR_039715          | 1.616950                        |
| MGAM2        | 93432     | NM_001293626       | 1.608772                        |
| LINC01506    | 101927015 | NR_109769          | 1.591292                        |
| MSC-A51      | 100132891 | NR_033651          | 1.586123                        |
| LY86         | 9450      | NM_004271          | 1.581566                        |
| CG88         | 94115     | NM_033183          | 1.574725                        |
| 5ELPLG       | 6404      | NM_001206609       | 1.571848                        |
| MUC20        | 200958    | NM_001282506       | 1.566180                        |
| LOC102723505 | 102723505 | NR_110876          | 1.560612                        |
| HLA-DQB2     | 3120      | NM_001198858       | 1.549792                        |
| IGHV1-69     | 28461     | OTTHUMT00000324207 | 1.548153                        |
| IL17RD       | 54756     | NM_017563          | 1.545380                        |
| ITGA10       | 8515      | NM_001303040       | 1.542583                        |
| MIR765       | 768220    | NR_030527          | 1.537287                        |
| ATP1B4       | 23439     | NM_001142447       | 1.530152                        |
| SNORD115-32  | 10003806  | NR_003347          | 1.525332                        |
| MCF2         | 4168      | NM_001098855       | 1.522990                        |
| PLK2         | 10769     | NM_001252226       | 1.522093                        |
| LY5MD4       | 145748    | NM_001284417       | 1.521513                        |
| EYA1         | 2138      | NM_000503          | 1.519507                        |
| C5orf46      | 389336    | NM_206966          | 1.518773                        |
| MCF2L-A51    | 100289410 | NR_034002          | 1.513757                        |
| PLP1         | 8511      | NM_003711          | 1.513729                        |
| MIR223A      | 442897    | NR_029890          | 1.506012                        |
| BARX2        | 8538      | NM_003658          | 1.505732                        |
| FUS          | 2521      | NM_001170634       | 1.500209                        |
| C5orf60      | 285679    | AK093042           | -1.503174                       |
| LOC105374261 | 105374261 | XR_924809          | -1.510150                       |
| MIR4318      | 100422857 | NR_036202          | -1.511169                       |
| LOC105370642 | 105370642 | XR_915933          | -1.525863                       |
| SCX          | 642659    | NM_001080514       | -1.542630                       |
| LINC00398    | 100874158 | NR_047012          | -1.562614                       |
| RPL23P8      | 222901    | NR_026673          | -1.569134                       |
| MIR3691      | 100500900 | NR_037462          | -1.604544                       |
| OR10AD1      | 121275    | NM_001004134       | -1.606547                       |
| MTRNR2L5     | 100463289 | NM_001190478       | -1.667533                       |
| LOC101929715 | 101929715 | BC111372           | -1.688932                       |
| LOC101929305 | 101929305 | XR_241170          | -1.690197                       |
| SLC9B1P3     | 100421008 | OTTHUMT00000047660 | -1.692214                       |
| SPANXC       | 84663     | uc004Rk.3          | -1.694244                       |
| SHISA2       | 387914    | NM_001007538       | -1.723789                       |
| FAM171B      | 165215    | NM_177454          | -1.736445                       |
| KRT35        | 3886      | NM_002280          | -1.900736                       |
| LOC105369381 | 105369381 | XR_913289          | -2.006661                       |
| LOC728093    | 728093    | XR_948446          | -2.011749                       |
| LOC101927120 | 101927120 | NR_110136          | -2.023709                       |
| MUC5B        | 727897    | NM_002458          | -2.038081                       |
| LINC01372    | 101929736 | NR_108104          | -2.073445                       |
| MIR3689E     | 100616460 | NR_039695          | -2.123141                       |
| NT1L         | 4500      | NR_001447          | -2.145291                       |
| MIR516A1     | 574498    | NR_030220          | -2.179300                       |
| SCGB1C2      | 653486    | NM_001097610       | -4.843478                       |
| C6orf58      | 352999    | NM_001010905       | -5.904671                       |

**Supplementary Figure 2. List of DEGs between adult and aged submandibular glands.** List of differentially expressed genes (DEGs) between adult and aged submandibular gland (based on at least a 1.5-fold change and  $p$  value < 0.05).

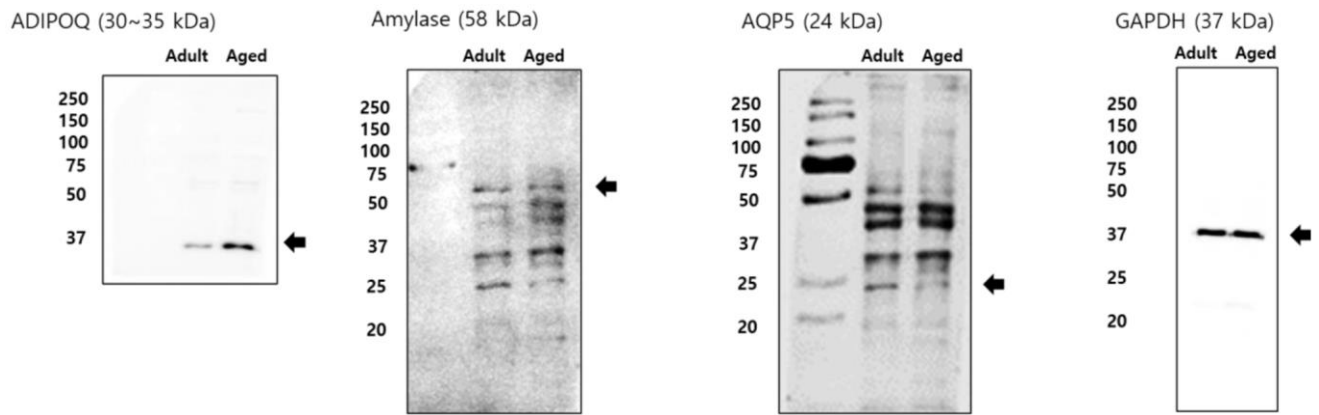

Supplementary Figure 3. Uncropped western blots of Figure 5F.

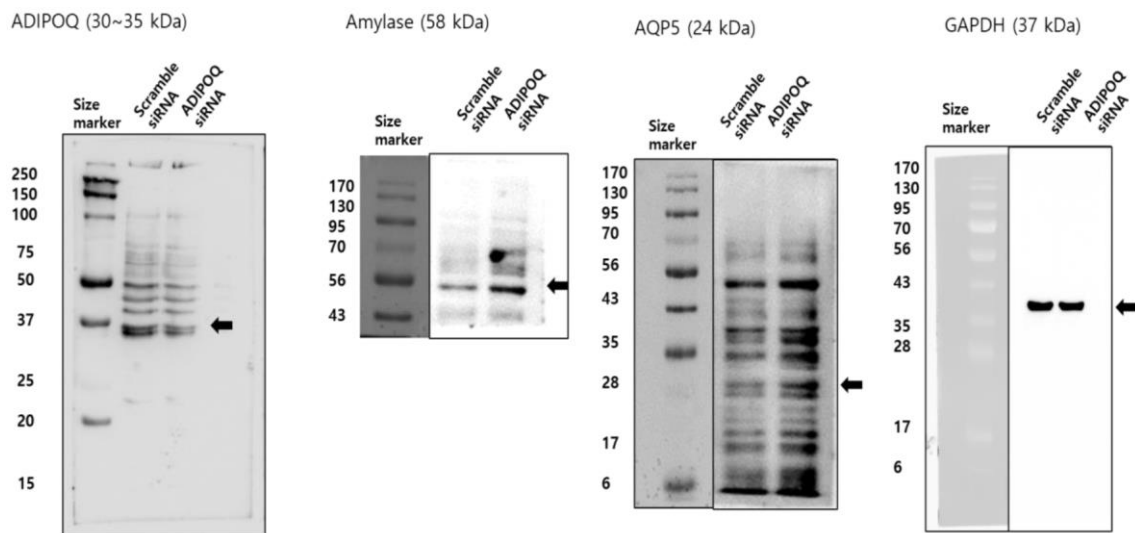

Supplementary Figure 4. Uncropped western blots of Figure 6F.

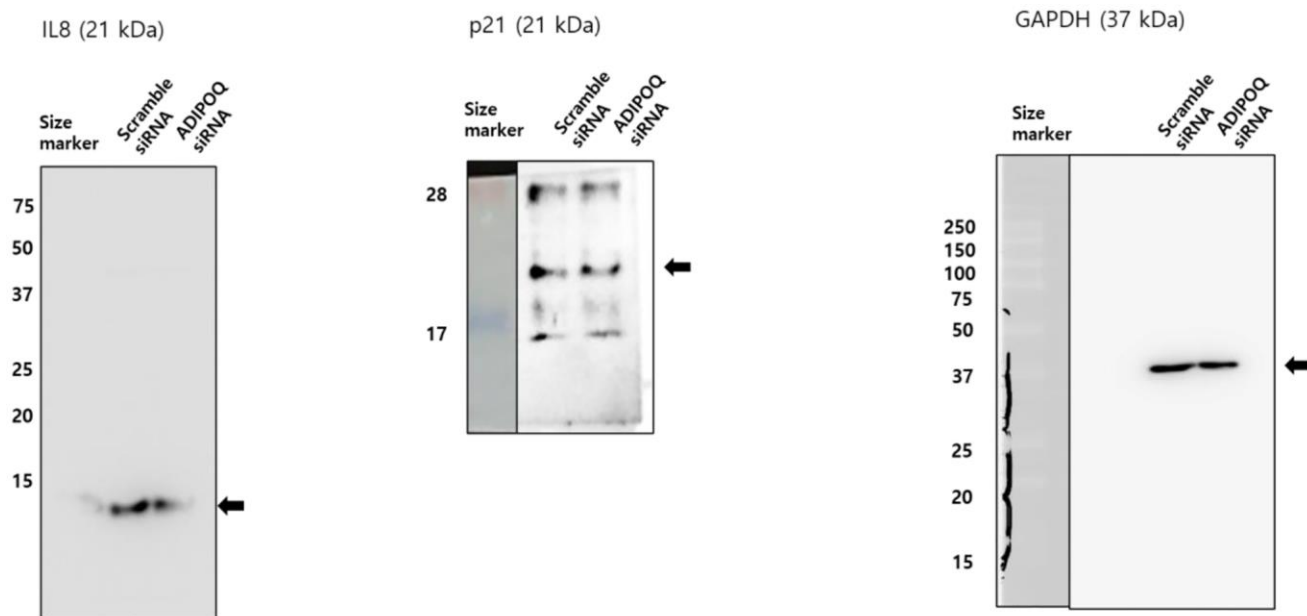

Supplementary Figure 5. Uncropped western blots of Figure 7C.

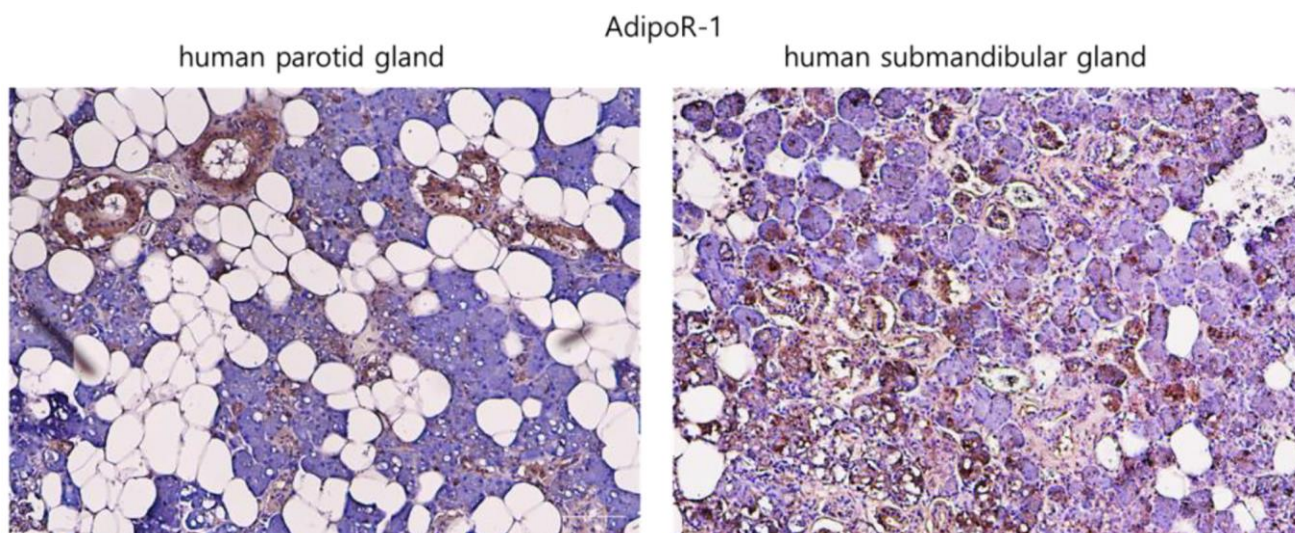

Supplementary Figure 6. The expression of AdipoR1 in human salivary gland tissues.
